# Supplementary material for: Deletion of hematopoietic Dectin-2 or CARD9 does not protect against atherosclerotic plaque formation in hyperlipidemic mice
Source: PubMed Central journal article supplement (PMC6416398; doi:10.1038/s41598-019-40663-x), 2019-03-13
Supplement: 41598_2019_40663_MOESM1_ESM.pdf [file 41598_2019_40663_MOESM1_ESM.pdf]

## **Deletion of hematopoietic Dectin-2 or CARD9 does not protect against atherosclerotic plaque formation in hyperlipidemic mice**

Kathrin Thiem<sup>1,\*,#</sup>, Geerte Hoeke<sup>2,3,#</sup>, Susan van den Berg<sup>7</sup>, Anneke Hijmans<sup>1</sup>, Cor W.M. Jacobs<sup>1</sup>, Enchen Zhou<sup>2,3</sup>, Isabel M. Mol<sup>2,3</sup>, Maria Mouktaroudi<sup>4</sup>, Johan Bussink<sup>5</sup>, Thirumala D. Kanneganti<sup>6</sup>, Esther Lutgens<sup>7,8</sup>, Rinke Stienstra<sup>1,9</sup>, Cees J. Tack<sup>1</sup>, Mihai G. Netea<sup>1,10</sup>, Patrick C.N. Rensen<sup>2,3</sup>, Jimmy F. P. Berbee<sup>2,3,\$</sup>, Janna A. van Diepen<sup>1,\$</sup>

<sup>1</sup>Dept. of Internal Medicine and Radboud Institute for Molecular Life Sciences, Radboud university medical center, Nijmegen, The Netherlands; <sup>2</sup>Dept. of Medicine, Div. of Endocrinology, <sup>3</sup>Eindhoven Laboratory for Experimental Vascular Medicine, Leiden University Medical Center, Leiden, The Netherlands; <sup>4</sup>Dept. of Internal Medicine, National and Kapodistrian University of Athens, Medical School, Athens, Greece; <sup>5</sup>Dept. of Radiation Oncology, Radboud University Medical Center, Nijmegen, The Netherlands; <sup>6</sup>Department of Immunology, St. Jude Children's Research Hospital, Memphis, TN, USA; <sup>7</sup>Dept of Medical Biochemistry, Div. of Experimental Vascular Biology, Academic Medical Center, University of Amsterdam, Amsterdam, The Netherlands; <sup>8</sup>Institute for Cardiovascular Prevention, Ludwig Maximilians University of Munich, Munich, Germany; <sup>9</sup>Div. of Human Nutrition, Wageningen University, Wageningen, The Netherlands; <sup>10</sup>Dept. for Genomics & Immunoregulation, Life and Medical Sciences Institute (LIMES), University of Bonn, Bonn, Germany.

#, \$ Authors contributed equally.

### **\* Corresponding author:**

Kathrin Thiem, Department of Internal Medicine (463), Radboud university medical center, Geert Grooteplein zuid 8, 6525 GA, Nijmegen, The Netherlands  
Phone: +31-243610244; E-mail: [kathrin.thiem@radboudumc.nl](mailto:kathrin.thiem@radboudumc.nl)

**Supplementary Table 1: Primer pairs used for amplification of aortic and liver genes**

| Primer name     | Gene accession numbers                                                                                                  | Primer sequence 5'→3'        |                           |
|-----------------|-------------------------------------------------------------------------------------------------------------------------|------------------------------|---------------------------|
|                 |                                                                                                                         | forward                      | reverse                   |
| <b>Cd68</b>     | NM_001291058.1                                                                                                          | CCAATTCAGGGTGAAGAAA          | CTCGGGCTCTGATGTAGGTC      |
| <b>iNos</b>     | 1.NM_001313921.1                                                                                                        | CGTTTCGGGATCTGAATGTGA        | GGGCAGCCTGTGAGACCTT       |
| <b>Mcr-1</b>    | NM_008625.2                                                                                                             | CTCTGTTCACTATTGGACGC         | CGGAATTTCTGGGATTCAGCTTC   |
| <b>Abca1</b>    | NM_013454.3                                                                                                             | GCTTGTGGCCTCAGTTAAGG         | GTAGCTCAGGCGTACAGAGAT     |
| <b>Abcg1</b>    | NM_009593.2                                                                                                             | GTGGATGAGGTTGAGACAGACC       | CCTCGGGTACAGAGTAGGAAAG    |
| <b>Cd68</b>     | NM_001291058.1                                                                                                          | CCAATTCAGGGTGAAGAAA          | CTCGGGCTCTGATGTAGGTC      |
| <b>Cd11c</b>    | NM_001363985.1<br>NM_021334.3<br>NM_001363984.1                                                                         | CTGGATAGCCTTTCTTCTGCTG       | GCACACTGTGTCCGAACTCA      |
| <b>Clec5a</b>   | NM_021364.2<br>NM_001038604.1                                                                                           | TGTGTTCAATGGCAATGTTACCA      | GCAGATCCAGCGATAGCTGAC     |
| <b>Clec4f</b>   | NM_016751.3                                                                                                             | ACTGAAGTACCAAATGGACAATGTTAGT | GTCAGCATTACATCCTCCAGA     |
| <b>Dectin-1</b> | NM_020008.3,<br>NM_001309637.1                                                                                          | AGGTTTTTCTCAGCCTTGCCTTC      | GGGAGCAGTGTCTCTTACTTCC    |
| <b>F4/80</b>    | NM_001355722.1<br>NM_001355723.1                                                                                        | CTTTGGCTATGGGCTTCCAGTC       | GCAAGGAGGACAGAGTTTATCGTG  |
| <b>Gata3</b>    | NM_001355111.1<br>NM_001355112.1<br>NM_001355110.1<br>NM_008091.3                                                       | AAGCTCAGTATCCGCTGACG         | GTTTCCGTAGTAGGACGGGAC     |
| <b>IL-6</b>     | NM_001314054.1<br>NM_031168.2                                                                                           | CAAGTCGGAGGCTTAATTACACATG    | ATTGCCATTGCACAACCTCTTTTCT |
| <b>IL-1β</b>    | NM_008361.4                                                                                                             | GCAACTGTTCTGAACCTCAACT       | ATCTTTTGGGGTCCGTCAACT     |
| <b>Mcp-1</b>    | NM_011333.3                                                                                                             | CCCAATGAGTAGGCTGGAGA         | TCTGGACCCATTCTTCTTG       |
| <b>Mhcll</b>    | NM_207105.3<br>NM_001033978.3                                                                                           | AGCCCCATCACTGTGGAGT          | GATGCCGCTCAACATCTTGC      |
| <b>Rorc</b>     | NM_001293734.1<br>NM_011281.3                                                                                           | TCCACTACGGGGTTATCACCT        | AGTAGGCCACATTACACTGCT     |
| <b>Tgfb1</b>    | NM_011577.2                                                                                                             | CCACCTGCAAGACCATCGAC         | CTGGCGAGCCTTAGTTTGGAC     |
| <b>Tnf-α</b>    | NM_013693.3                                                                                                             | CAGACCCTCACACTCAGATCATCT     | CCTCCACTTGGTGGTTTGCTA     |
| <b>36b4</b>     | NM_001357772.1<br>NM_001277982.2<br>NM_001357768.1<br>NM_001357770.1<br>NM_001277986.1<br>NM_001277983.1<br>NM_013669.2 | AGCGCGTCCTGGCATTGTGTGG       | GGGCAGCAGTGGTGGCAGCAGC    |

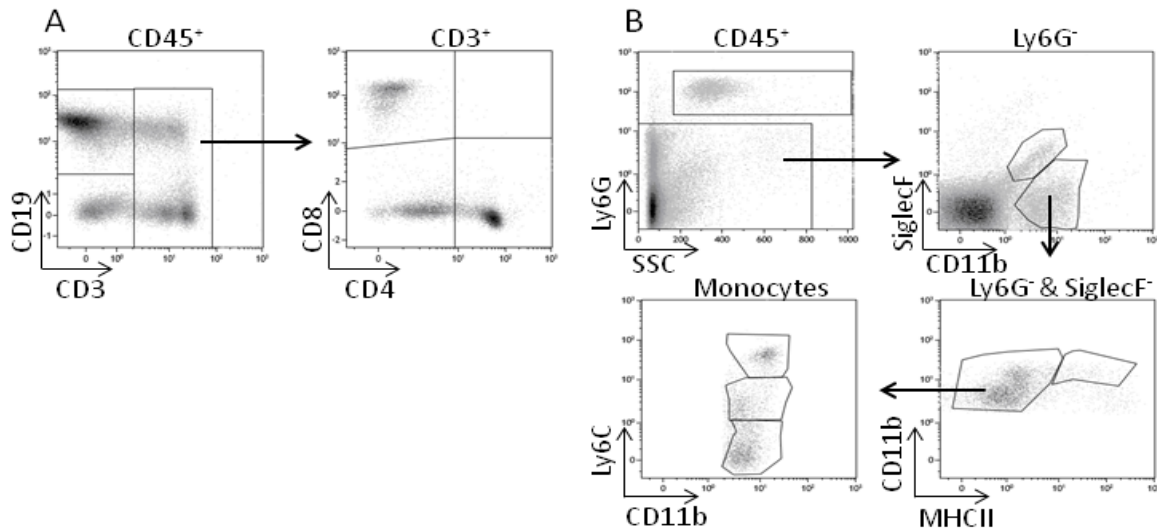

**Supplementary Figure 2.** Representative FACS plot for the identification of lymphoid and myeloid subsets in *Ldlr*<sup>-/-</sup> mice. (A) To identify lymphoid cells, B-cells (CD19<sup>+</sup>) were excluded from innate immune cells (CD45<sup>+</sup>), T-cells (CD19<sup>+</sup> and CD3<sup>+</sup>) were further subdivided into cytotoxic T-cells (CD8<sup>+</sup>) and T-helper cells (CD4<sup>+</sup>). To identify myeloid cells, (B) neutrophils (Ly6G<sup>+</sup>) were excluded from innate immune cells (CD45<sup>+</sup>) and non-neutrophils (Ly6G<sup>-</sup> and SiglecF<sup>-</sup>) cells were further subdivided into monocytes (CD11b<sup>+</sup>). Monocytes were then classified into pro-inflammatory (Ly6C<sup>high</sup>), intermediate (Ly6C<sup>medium</sup>) and anti-inflammatory (Ly6C<sup>low</sup>) monocytes.

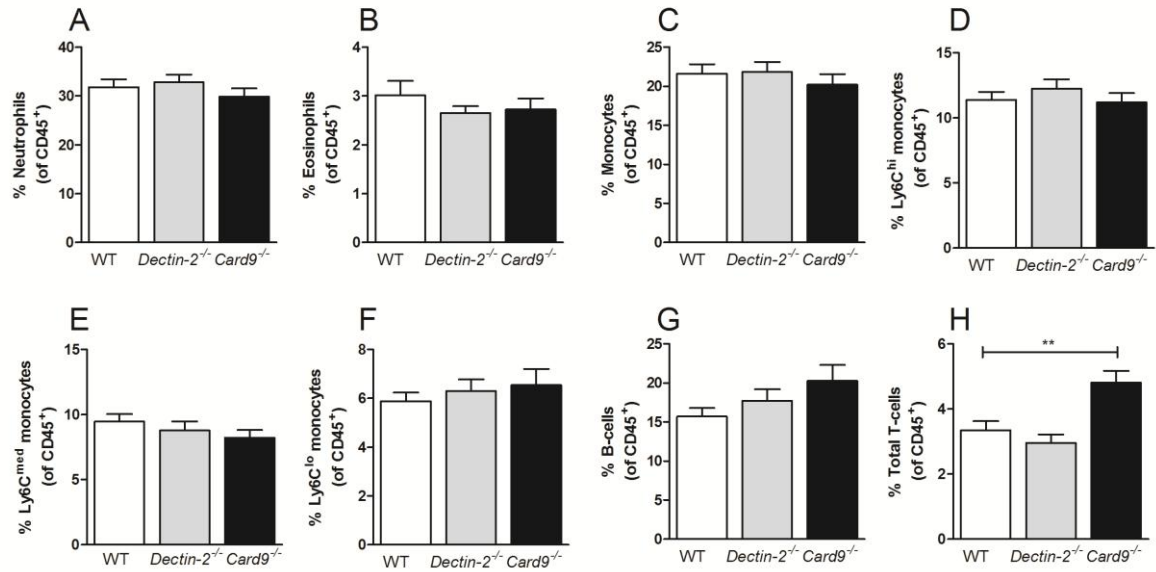

**Supplementary Figure 3. Depletion of CARD9 increases T-cell percentage in the bone marrow.** At the end of the study, after 10 weeks of Western-type diet feeding immune cell subset in *Ldlr*<sup>-/-</sup> mice transplanted with bone marrow from control (WT), *Dectin-2*<sup>-/-</sup> and *Card9*<sup>-/-</sup> mice were determined by flow cytometry. The percentage (of CD45<sup>+</sup>) of innate immune cell subsets are shown for (A) neutrophils, (B) eosinophils, (C) total Ly6C monocytes and subsets such as (D) L6C<sup>hi</sup>-, (E) Ly6C<sup>med</sup>-, (F) Ly6C<sup>lo</sup>-monocytes. The amount of adaptive immune cell subsets is shown for (G) B-cells and (H) T-cells. Data are presented as mean ± SEM. n=7-8/group. \*\**p*<0.01.

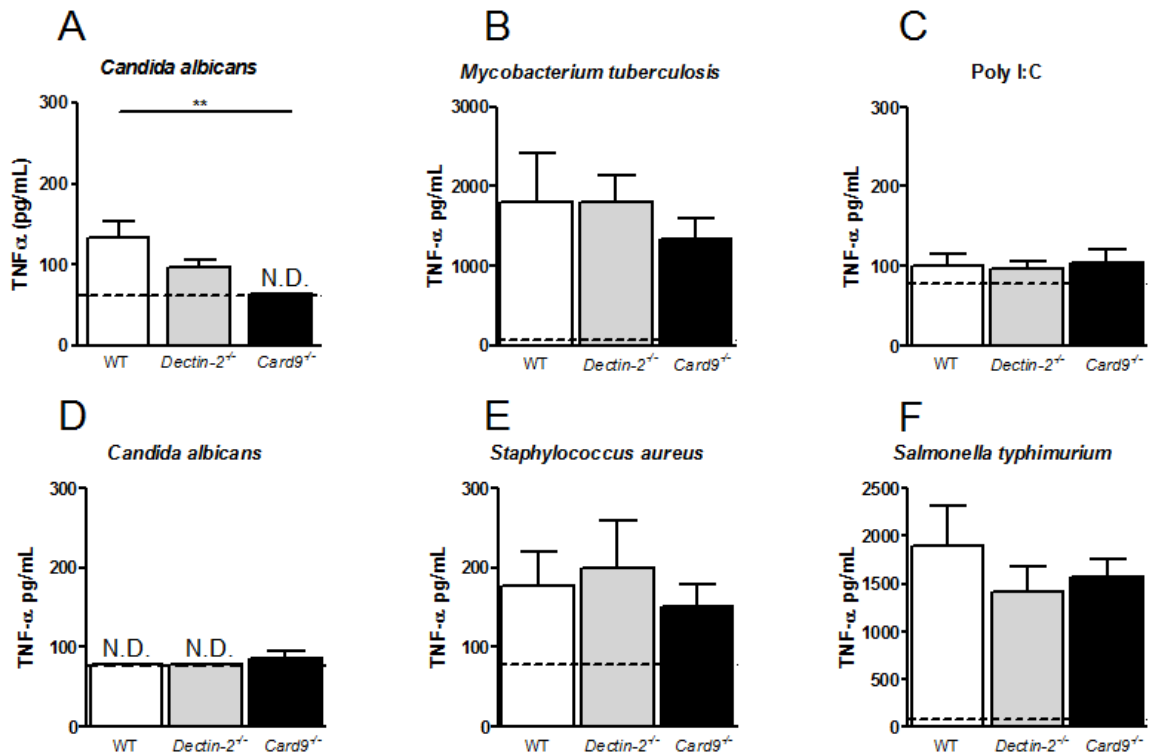

**Supplementary Figure 4: Deletion of hematopoietic CARD9 reduces TNF $\alpha$  secretion from splenocytes but not from BMDMs upon stimulation with CLR or TLR ligands.** At the end of the study, after 10 weeks of WTD feeding, mice were killed and splenocytes were isolated and *ex vivo* stimulated with (A) *Candida albicans*. Bone marrow-derived macrophages (BMDMs) were stimulated *ex vivo* with (B) *Mycobacterium tuberculosis* (H37Rv), (C) poly I:C, (D) *Candida albicans*, (E) *Staphylococcus aureus*, and (F) *Salmonella typhimurium*. The secretion of tumor necrosis factor (TNF) $\alpha$  by both cell types was determined. Data represent mean  $\pm$  SEM. n=8/group. \*\* $p$ <0.01. Black dotted line indicates detection limit of the assay.

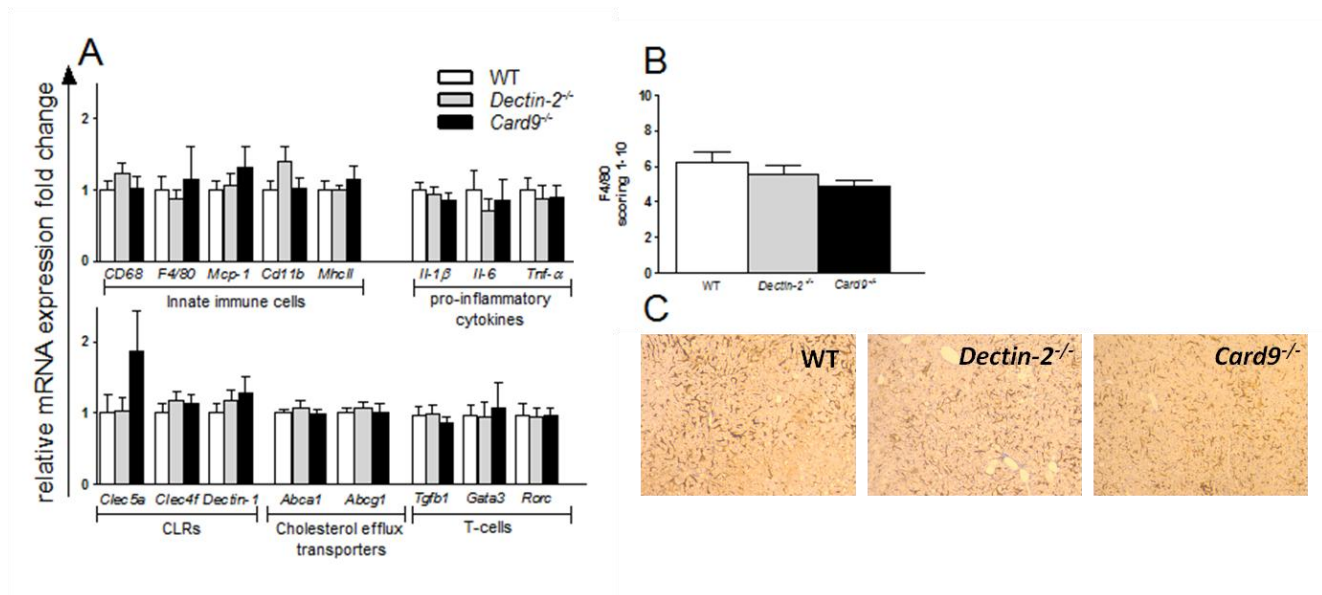

**Supplementary Figure 5: Deletion of hematopoietic Dectin-2 or CARD9 did not influence hepatic expression of inflammatory markers or immunohistochemical macrophage marker.** After 10 weeks of Western-type diet feeding, liver mRNA was isolated from *Ldlr*<sup>-/-</sup> mice transplanted with BM from control (WT), *Dectin-2*<sup>-/-</sup> or *Card9*<sup>-/-</sup> and RT-qPCR was used to quantify the (A) expression of markers for monocyte/macrophage, inflammation, C-type lectin receptors (CLRs), cholesterol metabolism and T-cells. Liver sections were prepared for histopathological analysis of macrophage marker F4/80 under a light microscope. (B) Macrophage content was ranked by two blinded researchers with a value between 1 and 10 whereby 10 is indicating greatest abundance. (C) Representative pictures of the liver are shown, x10. Data are presented as mean  $\pm$  SEM. Gene expression: n=12/group, Immunohistochemical F4/80 staining: n=8/group. *Cd68*, Cd68 antigen; *F4/80*, Adhesion G protein-coupled receptor E1; *Mcp1*, Chemokine (C-C motif) ligand 2; *Cd11b*, Integrin alpha M; *Mhcll*, Histocompatibility-2; *IL-1 $\beta$* , Interleukin 1 $\beta$ ; *IL-6*, Interleukin 6; *TNF $\alpha$* , tumor necrosis factor  $\alpha$ ; *Clec5a*, CLR domain family 5 member A; *Clec4f*, CLR domain family 4 member F; *Dectin1/Clec7a*, CLR domain family 7 member A; *Abca1*, ATP binding cassette sub family A, member 1; *Abcg1*, ATP binding cassette sub family G, member 1; *Tgfb1*, Transforming growth factor, beta 1; *Gata3*, GATA binding protein 3; *Rorc*, RAR-related orphan receptor gamma.
